# Supplementary material for: Improvement of Poly(lactic acid)-Poly(hydroxy butyrate) Blend Properties for Use in Food Packaging: Processing, Structure Relationships
Source: Polymers (Basel). 2022 Nov 24;14(23):5104. doi: 10.3390/polym14235104 (PMC9736990; doi:10.3390/polym14235104)
Supplement: Supplementary file 1 [file polymers-14-05104-s001.zip › polymers-2016273-supplementary.pdf]

## Supplementary Materials

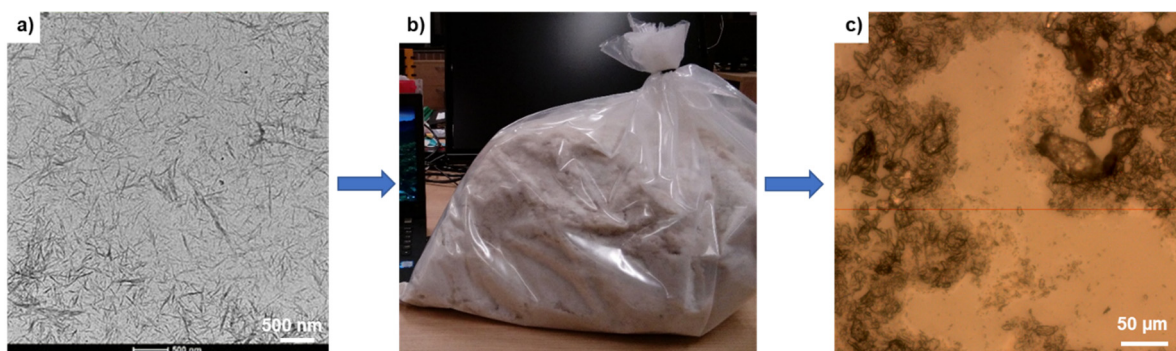

**Figure S1.** a) SEM image of cellulose nanocrystals before freeze-dried b) Freeze dried cellulose nanocrystals c) optical microscopy of dried nanocrystals showing agglomeration.

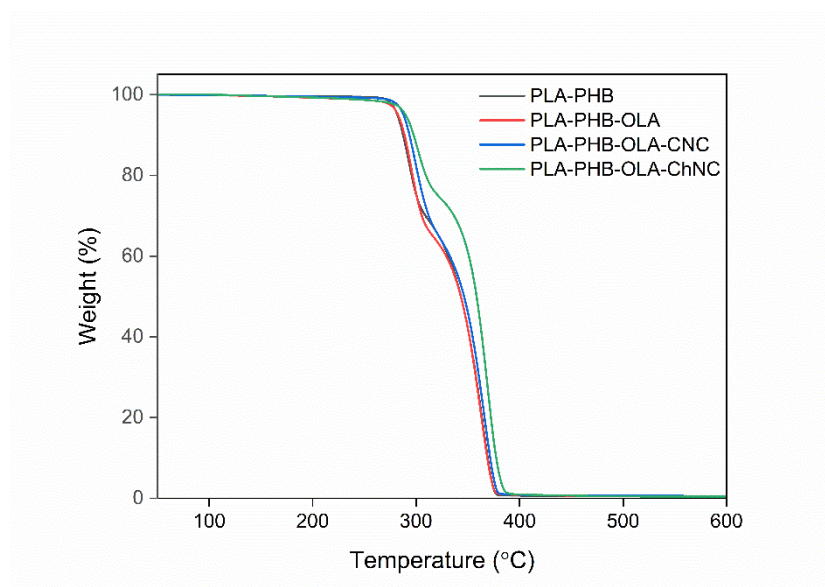

**Figure S2.** TGA thermogram of the blown films.

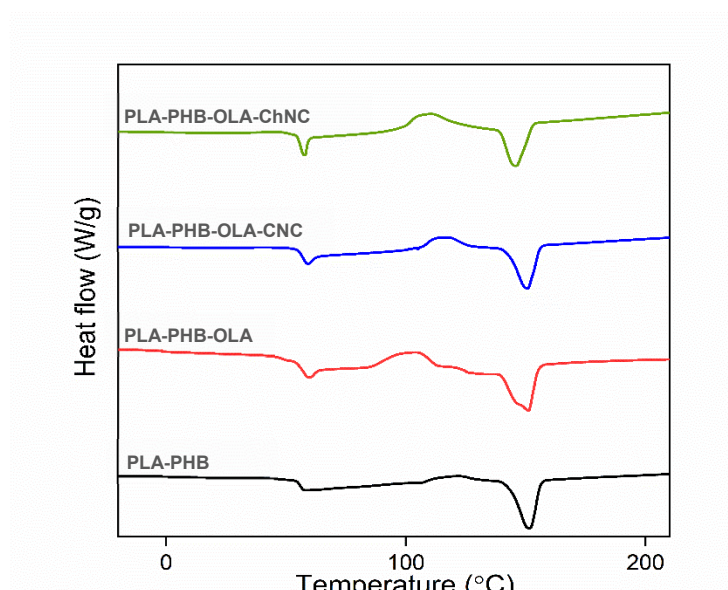

**Figure S3.** DSC thermogram of the blown films.

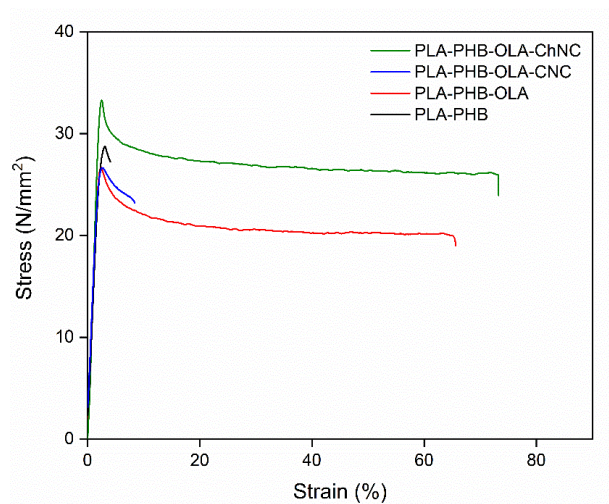

**Figure S4.** Tensile stress-strain graphs of blown films in blowing direction.
